# 1 **Preventions of oral self-mutilation in** 2 **patients with Lesch-Nyhan syndrome**

3 **Lorevanda V. de Carvalho<sup>1</sup>, Luan F. de Oliveira<sup>2</sup>, and Tiago F. Chaves<sup>3</sup>**

4 <sup>1</sup>**Graduation in Medicine, Federal University of Acre, Rio Branco - AC, Brazil.**

5 <sup>2</sup>**Biomedic, PhD Student in Cell Biology and Development, Federal University of Santa**  
6 **Catarina, Florianópolis -SC, Brazil**

7 <sup>3</sup>**Biologist, PhD Student in Cell Biology and Development, Federal University of Santa**  
8 **Catarina, Florianópolis -SC, Brazil.**

9 Corresponding author:

10 Lorevanda V. de Carvalho<sup>1</sup>

11 Email address: [lorencarvalho.ali@gmail.com](mailto:lorencarvalho.ali@gmail.com)

## 12 **ABSTRACT**

13 Lesch-Nyhan syndrome (LNS) is a rare genetic disorder linked to the X chromosome that implies an  
14 inborn error of metabolism, due to deficiency in the purine metabolic pathway, affected individuals present  
15 neurological symptoms, such as cognitive and motor impairment, besides behavioral changes such as self  
16 and hetero-aggression. This characteristic aggressive behavior leads to insults and self-mutilation, thus  
17 requiring methods of self-protection, some invasive and permanent, such as tooth extraction. Noninvasive  
18 methods, such as the use of oral protectors, pharmacological therapies and botulinum toxin A applications,  
19 are also employed to decrease discomfort and the implications of such behavior. We describe briefly the  
20 methods of prevention against oral self-mutilation in patients with Lesch-Nyhan syndrome found in the  
21 literature.

## 22 **INTRODUCTION**

23 First described in 1964, Lesch-Nyhan syndrome (LNS) is a rare disorder linked to the X chromosome,  
24 that approximately one in 380,000 live births (Nyhan (1997)). It causes disturbance in the uric acid  
25 metabolism and central nervous system (CNS)(Lesch and Nyhan (1964)) due to mutations in the gene  
26 that codes for the hypoxanthine-guanine phosphoribosyltransferase enzyme (HPRT1), located between  
27 Xq26 and Xq27, an important enzyme in the purine rescue route (Bell et al. (2016)). This results in  
28 total or partial lack of HPRT activities and high level of uric acid concentration in urine (Dabrowski and  
29 Medicine (2005)). The pathology may also be associated with dopaminergic activity deficits in the basal  
30 ganglia (Visser et al. (2000)). The characteristic framework of LNS consists of a set of neurological  
31 behaviors and symptoms, presenting a delay in the motor development and variable degrees of cognitive  
32 impairment, self-injurious behavior (self-mutilation) that manifest during the first year of life (Bell et al.  
33 (2016)). Patients are generally not able to sit independently and remain impassable throughout life, more  
34 specifically, self-mutilation, which generally leads to the correct diagnosis of Lesch-Nyhan syndrome  
35 (Christie et al. (1982); Schroeder et al. (2001)). According to Anderson and Ernst (1994), out of the 40  
36 Lesch-Nyhan patients, the study found that 90% had permanent physical damage due to self-mutilation.  
37 Patients are aware of their self-harming behavior and become agitated and afraid when their protective  
38 and restrictive gear are removed (Lesch and Nyhan (1964)). The restriction method seems to be the  
39 most suitable for controlling self-mutilation. Regarding the restrictions and nozzle protections used to  
40 avoid self-mutilation, tooth extraction has been the most used method to reduce self-harming behavior  
41 (Campolo González et al. (2018)). Even after tooth extraction, these edentulous patients turn to other  
42 forms of self-mutilation, in many cases using their fingers to cause self-injury (Gutierrez et al. (2008)).  
43 Other noninvasive methods include mild mouthguard use and psychiatric pharmacological therapy to  
44 avoid further damage to soft perioral tissues. Recent treatments include the use of botulinum toxin type  
45 A (BTX-A) injected into the bilateral masseters. BTX-A temporarily prevents presynaptic release of  
46 acetylcholine, causing motor plaque dysfunction and muscle weakness (Dabrowski and Medicine (2005));

47 Zilli and Hasselmo (2008); Jeong et al. (2006); Olson and Houlihan (2000)). The focus of this work is to  
48 present prevention methods against oral self-mutilation in patients with Lesch-Nyhan syndrome found in  
49 literature.

## 50 PREVENTIVE METHODS

### 51 Pharmacotherapy

52 Among the treatments used to alleviate the causes of this syndrome is the use of drugs aimed at inhibiting  
53 the conversion of guanine and hypoxanthine to uric acid by HPRT. One of the most commonly used  
54 drugs is allopurinol, treatment with allopurinol reduces serum levels of urate and uric acid and thus  
55 prevents crystaluria, nephrolithiasis and gout. Some benzodiazepines and gamma-aminobutyric acid  
56 inhibitors are used for the treatment of spasticity and dystonias, but due to the lack of knowledge about  
57 neurological dysfunctions, useful therapies have not been found, and rehabilitation and muscle and  
58 postural training programs are recommended. And for the control of self-mutilation, neuroleptics are used  
59 to minimize this behavior. Benzodiazepines and carbamazepine are the most useful for decreasing anxiety  
60 and suppressing harmful behavior (Zilli and Hasselmo (2008); Jeong et al. (2006)). Despite the numerous  
61 benefits always reported to the use of these medications (Campolo González et al. (2018); Gutierrez et al.  
62 (2008)). Buitelaar (1993), advises caution for many reasons. Primarily due to the sedative properties  
63 induced by these drugs that prevent patients in both their cognitive functions and their physical abilities,  
64 and secondly due long-term use side effects. In a case reported by Jeong et al. (2006), the patient was  
65 receiving a daily dose of 2 mg diazepam to relieve the self-injurious action, but their success was limited.  
66 After being submitted to a new psychiatric consultant, his medication was changed to sertraline 12.5 mg  
67 and 0.25 mg risperidone, to control anxiety and self-injurious behavior. After seven days the dosages  
68 of both drugs were doubled. After 15 days, the self-mutilation and shaking behavior was significantly  
69 reduced and the interaction between the patient and his mother improved. According to the author within  
70 1 month, the frequency of self-injurious behavior was limited to less than a single attempt per week, after  
71 4 months of such pharmacotherapy resulted in the complete disappearance of self-injurious behavior  
72 without any side effects.

### 73 Oral Device

74 The use of mouthguards is widely described in the technical literature . The use of mouth guards is  
75 extensively described in the technical literature were described by Anderson and Ernst (1994); Jeong  
76 et al. (2006). Scott and Ranalli (2005), mentions that the applications of oral protection devices are  
77 many and varied, from the use as protector to the therapeutic one. Olson and Houlihan (2000), describe  
78 the follow-up of a case, which the pediatric dentist build a two-piece acrylic mouth guard to fit firmly  
79 on the patient's upper and lower teeth. In addition, there was a verbally reinforcing training for the  
80 patient to keep the mouth guard in the correct mouth position. Jeong et al. (2006), emphasizes in his  
81 case study the development of a soft mouthguard, which was fabricated and modeled using Biostar  
82 (Scheu-Dental, Iserlohn, Germany). The upper dental arch was covered with a mouth guard made of soft  
83 resin material. During the periodic dental monitoring phase, the patient appeared to be well adapted to  
84 this soft mouthguard, and reduced frequency of general self-mutilation included fewer lip bites in the first  
85 2 weeks of mouthguard use along with pharmacotherapy, according to the author's emphasis the treatment  
86 results were very promising. The most commonly used oral device is a soft mouth guard (Dabrowski and  
87 Medicine (2005); Jeong et al. (2006); Olson and Houlihan (2000)).

88

- 89 1. Bite-Blocks (Figure 1);
- 90
- 91 2. A combination of extraoral and intraoral orthodontic apparatus that covers the chin and is held in  
92 place with a rubber band around the head or with a helmet on the neck-strap (Figure 2);
- 93
- 94 3. Acrylic trays intended to force the lower lip anteriorly onto the lower teeth (Figure 3B);
- 95
- 96 4. Various types of shields that protect the tongue and lips from direct injury (Figure 3A);
- 97
- 98 5. Labial bumpers welded onto orthodontic bands or stainless-steel crowns (Figure 4);

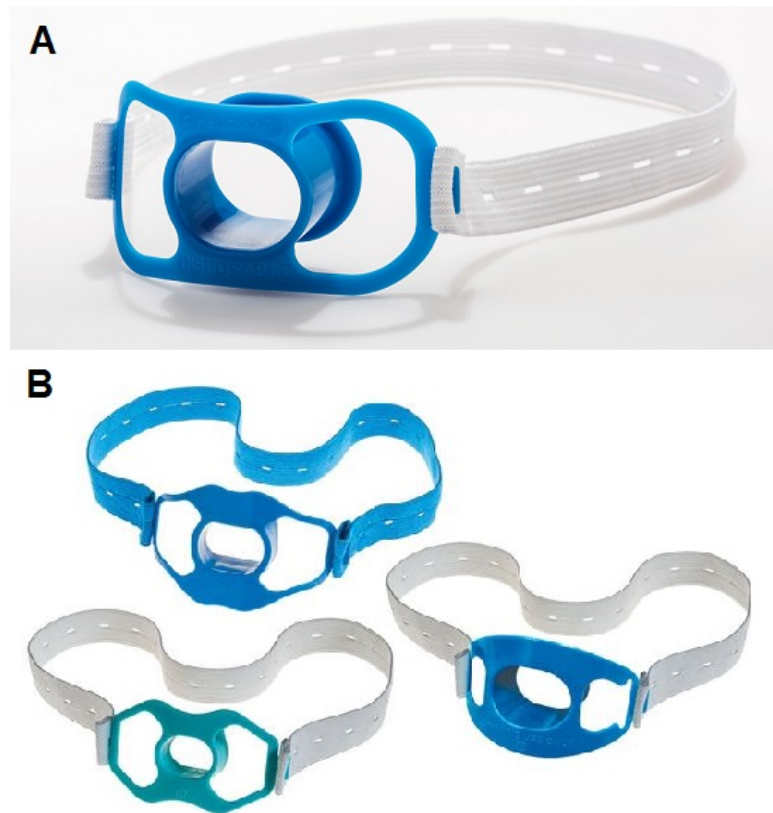

**Figure 1.** Models of Bite Blocks. (A) Endoscopic Bite Blocks by Choice, (B) ScopeValet™ - Endoscopic Bite Blocks by Healthcare (2018).

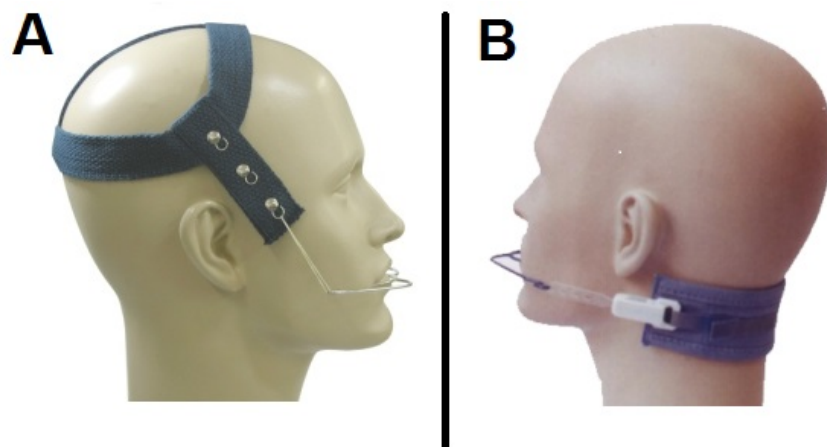

**Figure 2.** Models of helmet on the neck-strap. (A) Extra Oral Supplies by Biodental (2018), (B) Extraoral Supplies by JJORTHO and Tencent (2018).

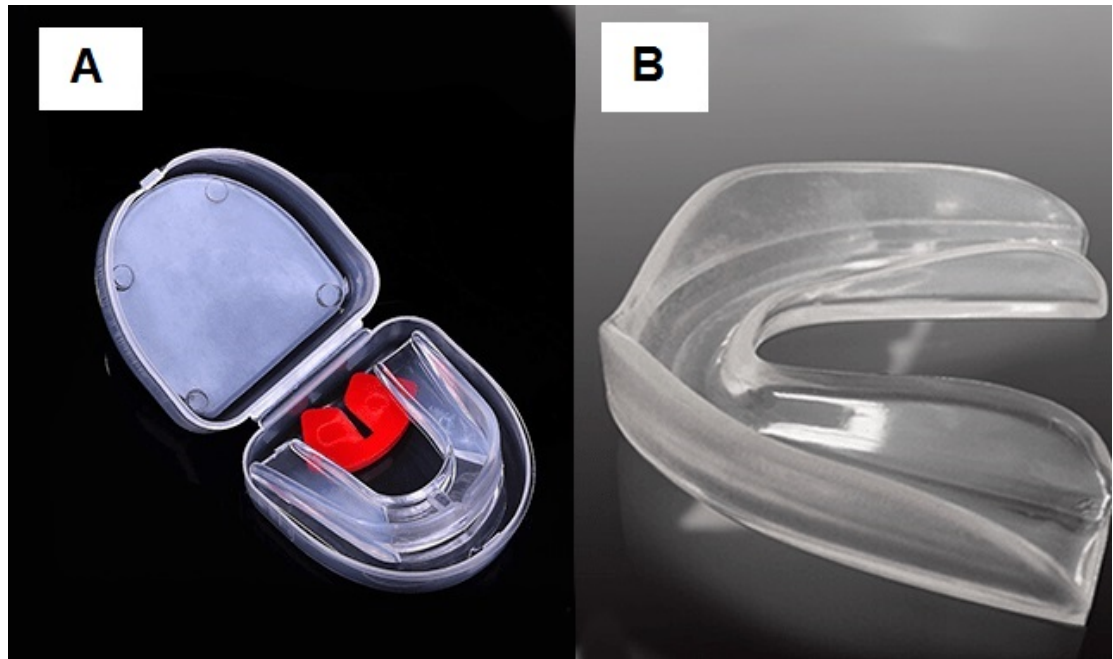

**Figure 3.** Mouthguard double model (A) that is used at the bottom and top and mouthpiece singular model (B) with single format for upper teeth. Source: Fighter (2018).

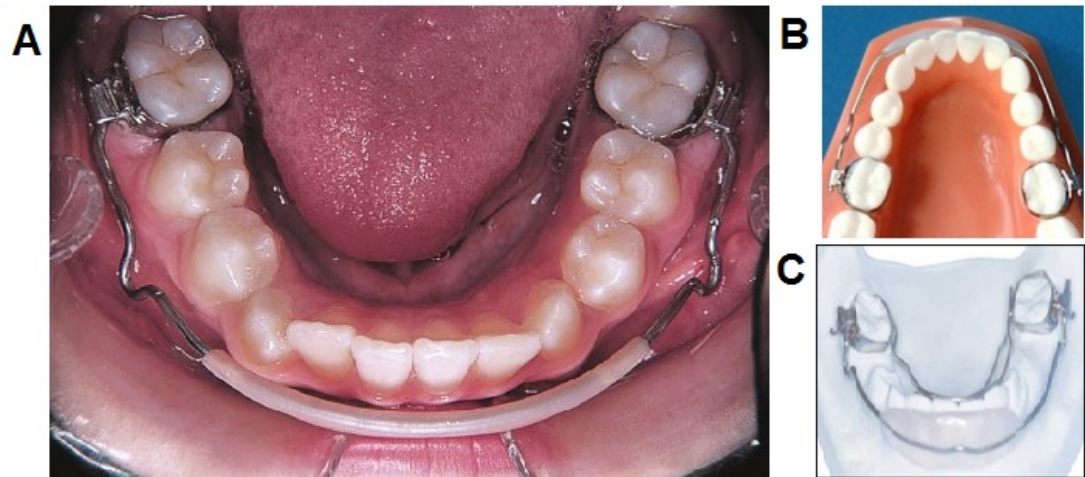

**Figure 4.** (A) Intraoral occlusal view with hard arc labial bumpers (Jacob et al. (2014)). (B and C) Lip Bumpers Models (Care (2018)).

99

## 100 **Botulinum Toxin Type-A**

101 Dabrowski and Medicine (2005), present a case of an LNS patient who underwent botulinum toxin A  
102 (BTX-A) treatment injected into the bilateral masseters. The active principle of BTX-A is to temporarily  
103 prevent presynaptic release of acetylcholine, causing motor plaque dysfunction and muscle weakness. As  
104 reported, the treatment resulted in a significant reduction in self-injurious behavior and healing of the  
105 patient's local lesions. This work suggested a biological mechanism of action of BTX-A in the central  
106 and peripheral nervous system, which results in a reversal of this behavioral pathway. In the treatment  
107 of the mentioned study, BTX-A was administered in both masseter muscles, with 20 units of BTX-A  
108 being injected at each site, meaning a total of 40 units per muscle group. The toxin was reconstituted with  
109 1cm<sup>3</sup> of saline solution; its application was performed using a 27-gauge needle and 1cm<sup>3</sup> syringe. These  
110 applications were repeated every 3 months for a series of three visits. BTX-A was well tolerated, and  
111 benefits lasted up to 10 weeks, when at last the behavior returned, requiring the use of restrictions. During  
112 this treatment the patient was able to return to school, his wounds on his hands, lips and tongue healed  
113 completely, his speech ability improved, although he continued to be abnormal. According to the authors,  
114 no impact was observed on the ability to eat or swallow, which contributed to the patient's physiology. The  
115 family emphasized a decrease in self-harm behavior as well as hostility. The conclusion of the treatment  
116 suggested that BTX-A may be more active, either directly on the peripheral nervous system or indirectly  
117 on the central nervous system, interfering with the pathway of behavior that causes self-mutilation to  
118 occur in the LNS. Other study carried out by Gutierrez et al. (2008), reports the application of BTX-A on  
119 the muscles of a 30-year-old male patient. According to Gutierrez, the application of BTX-A in muscles  
120 instead of masseters is due to the patient having his lesions mainly on the lips. The author of the study also  
121 points out that the other method employed by Dabrowski and Medicine (2005) requires significant doses  
122 of BTX-A and may have spread to the pharyngeal muscles, thus affecting dysphagia. In this methodology  
123 2 sessions were applied every 3 months, the injections in the both zygomatic muscles, in the lower part of  
124 the orbicularis oculi muscle and lower upper eyelid of the lip. During applications, there was a significant  
125 drop in oral self-mutilations. This study reinforces the results of the therapeutic approach of BTX-A,  
126 reporting a decrease in harmful behavior, improvement of patient's tissues and no adverse side effects.  
127 Despite the limitations of these studies, because it is applied in only two invidious, it is a safe and effective  
128 alternative therapeutic treatment for the decrease or elimination of the self-mutilations in LNS(Dabrowski  
129 and Medicine (2005); Gutierrez et al. (2008)).

## 130 **FINAL CONSIDERATIONS**

131 The technical literature concludes that there are no specific references methods for the prevention of this  
132 type self-mutilation, methods need to be developed and applied according to the needs of each patient. As  
133 an alternative to dental extraction, it is suggested a combination psychiatric therapy, pharmacological,  
134 dental treatment, personalized mouthguard and, in extreme cases, the application of treatment based  
135 on botulinum toxin type-A is a viable option in reducing, decreasing and in eliminating self-injurious  
136 behavior involving the oral pathways.

## 137 **AUTHOR CONTRIBUTIONS**

138 All authors contributed equally to the elaboration, revision and approval of the final article.

## 139 **COMPETING INTERESTS**

140 No competing interests were disclosed.

## 141 **GRANT INFORMATION**

142 The author(s) declared that no grants were involved in supporting this work.

## 143 **REFERENCES**

144 Anderson, L. T. and Ernst, M. (1994). Self-injury in Lesch-Nyhan disease. *Journal of Autism and*  
145 *Developmental Disorders*, 24(1):67–81.



- 146 Bell, S., Kolobova, I., Crapper, L., and Ernst, C. (2016). Lesch-Nyhan syndrome: Models, theories, and  
147 therapies. *Molecular Syndromology*, 7(6):302–311.
- 148 Biodental (2018). Casquete - Tração Alta - Todos - Biodental.
- 149 Buitelaar, J. K. (1993). Self-injurious behaviour in retarded children: clinical phenomena and biological  
150 mechanisms. *Acta paedopsychiatrica*, 56(2):105–111.
- 151 Campolo González, A., Vargas Díaz, A., Fontboté Riesco, D., and Hernández Chávez, M. (2018).  
152 Síndrome de Lesch-Nyhan y automutilación oral. Reporte de un caso. *Revista chilena de pediatría*,  
153 89(1):86–91.
- 154 Care, D. O. (2018). Types of Appliances — Landstuhl Germany — Dillon Orthodontic Care.
- 155 Choice, C. (2018). Endoscopic Bite Blocks – Clinical Choice.
- 156 Christie, R., Bay, C., Kaufman, I. A., Bakay, B., and Borden, M. (1982). Lesch-Nyhan Disease: Clinical  
157 Experience with Nineteen Patients. *Developmental Medicine & Child Neurology*, 24(4):293–306.
- 158 Dabrowski, E. and Medicine, P. (2005). Case report Botulinum toxin as a novel treatment for self-  
159 mutilation in Lesch – Nyhan syndrome. pages 636–639.
- 160 Fighter, F. (2018). TKD Olímpico – Fusion Fighter.
- 161 Gutierrez, C., Pellene, A., and Micheli, F. (2008). Botulinum toxin: Treatment of self-mutilation in  
162 patients with Lesch-Nyhan syndrome. *Clinical Neuropharmacology*, 31(3):180–183.
- 163 Healthcare, R. (2018). ScopeVale<sup>TM</sup> Endoscopic Bite Blocks – Ruhof Healthcare.
- 164 Jacob, H. B., LeMert, S., Alexander, R. G., and Buschang, P. H. (2014). Second molar impaction  
165 associated with lip bumper therapy. *Dental Press Journal of Orthodontics*, 19(6):99–104.
- 166 Jeong, T.-S., Lee, J.-H., Kim, S., Kim, J.-H., and Tootla, R. G. H. (2006). A preventive approach to oral  
167 self-mutilation in Lesch-Nyhan syndrome: a case report. *Pediatric dentistry*, 28(4):341–4.
- 168 JJORTHO and Tencent (2018). How do parents respond to the three most rebellious ages? - Tencent.
- 169 Lesch, M. and Nyhan, W. L. W. (1964). A familial disorder of uric acid metabolism and central nervous  
170 system function. *The American journal of medicine*, 9(April):561–570.
- 171 Nyhan, W. L. (1997). The recognition of Lesch-Nyhan syndrome as an inborn error of purine metabolism.  
172 *Journal of Inherited Metabolic Disease*, 20(2):171–178.
- 173 Olson, L. and Houlihan, D. (2000). A review of behavioral treatments used for Lesch-Nyhan syndrome.  
174 *Behavior Modification*, 24(2):202–222.
- 175 Schroeder, S. R., Oster-Granite, M. L., Berkson, G., Bodfish, J. W., Breese, G. R., Cataldo, M. F., Cook,  
176 E. H., Crnic, L. S., DeLeon, I., Fisher, W., Harris, J. C., Horner, R. H., Iwata, B., Jinnah, H. A., King,  
177 B. H., Lauder, J. M., Lewis, M. H., Newell, K., Nyhan, W. L., Rojahn, J., Sackett, G. P., Sandman,  
178 C., Symons, F., Tessel, R. E., Thompson, T., and Wong, D. F. (2001). Self-injurious behavior: Gene-  
179 brain-behavior relationships. *Mental Retardation and Developmental Disabilities Research Reviews*,  
180 7(1):3–12.
- 181 Scott, L. K. and Ranalli, D. (2005). Adaptations of mouthguards for patients with special needs. *Special  
182 Care in Dentistry*, 25(6):296–301.
- 183 Visser, J. E., Bär, P. R., and Jinnah, H. A. (2000). Lesch-Nyhan disease and the basal ganglia. *Brain  
184 Research Reviews*, 32(2-3):449–475.
- 185 Zilli, E. A. and Hasselmo, M. E. (2008). A model of behavioral treatments for self-mutilation behavior in  
186 Lesch-Nyhan syndrome. *NeuroReport*, 19(4):459–462.
